# Supplementary material for: Effect of MBOAT7 variant on hepatitis B and C infections in Moroccan patients
Source: PubMed Central journal article supplement (PMC6095921; doi:10.1038/s41598-018-30824-9), 2018-08-16

## Supplementary Information

### Effect of *MBOAT7* variant on hepatitis B and C infections in Moroccan patients

Sayeh Ezzikouri <sup>1\*</sup>, Raouia Elfihry <sup>1,2#</sup>, Hajar Chihab <sup>1,3#</sup>, Mohcine Elmessaoudi-Idrissi <sup>1</sup>, Imane Zaidane <sup>1</sup>, Fatima Zahra Jadid <sup>1</sup>, Adnane Karami <sup>1</sup>, Mohamed Tahiri <sup>4</sup>, Abdellah Elhabazi <sup>3</sup>, Mostafa Kabine <sup>2</sup>, Mohammed Chair <sup>3</sup>, Pascal Pineau <sup>5</sup>, Soumaya Benjelloun <sup>1</sup>

<sup>1</sup>Virology Unit, Viral Hepatitis Laboratory, Institut Pasteur du Maroc. Casablanca, Morocco

<sup>2</sup>Santé et Environnement, Faculté des Sciences Aïn Chock, Casablanca, Morocco

<sup>3</sup>Laboratoire de Biotechnologie, Biochimie et Nutrition, Université Chouaib Doukkali, Faculté des Sciences d'El Jadida, El Jadida, Morocco

<sup>4</sup>Service d'Hépatogastro-entérologie, CHU Ibn Rochd, Casablanca, Morocco

<sup>5</sup>Unité "Organisation Nucléaire et Oncogénèse", INSERM U993, Institut Pasteur, Paris, France

# These authors contributed equally to the manuscript

\* Correspondence should be addressed to Dr. Sayeh Ezzikouri, Virology Unit, Viral Hepatitis Laboratory, Institut Pasteur du Maroc, 1 Place Louis Pasteur, 20360 Casablanca-Morocco. Tel: +212 5 22434470; Fax: +212522260957; E.mail: [sayeh.ezzikouri@pasteur.ma](mailto:sayeh.ezzikouri@pasteur.ma)

Supplementary table 1: Effect of *MBOAT7* rs641738 polymorphism on the outcomes HBV infection

|                     | <b>Chronic HBV infection<br/>(N= 266)</b> | <b>%</b> | <b>HBV-Spontaneous<br/>clearance<br/>(N= 126)</b> | <b>%</b> | <b>OR</b> | <b>lower</b> | <b>upper</b> | <b>p-value</b> | <b>AIC*</b> |
|---------------------|-------------------------------------------|----------|---------------------------------------------------|----------|-----------|--------------|--------------|----------------|-------------|
| <b>Codominant</b>   |                                           |          |                                                   |          |           |              |              |                |             |
| C/C                 | 80                                        | 30.1     | 41                                                | 32.8     | 1         |              |              | 0.320452725    | 493.8       |
| C/T                 | 119                                       | 44.7     | 61                                                | 48.8     | 1         | 0.61         | 1.63         |                |             |
| T/T                 | 67                                        | 25.2     | 23                                                | 18.4     | 0.67      | 0.37         | 1.23         |                |             |
| <b>Dominant</b>     |                                           |          |                                                   |          |           |              |              |                |             |
| C/C                 | 80                                        | 30.1     | 41                                                | 32.8     | 1         |              |              | 0.587778305    | 493.7       |
| C/T-T/T             | 186                                       | 69.9     | 84                                                | 67.2     | 0.88      | 0.56         | 1.39         |                |             |
| <b>Recessive</b>    |                                           |          |                                                   |          |           |              |              |                |             |
| C/C-C/T             | 199                                       | 74.8     | 102                                               | 81.6     | 1         |              |              | 0.131386933    | 491.8       |
| T/T                 | 67                                        | 25.2     | 23                                                | 18.4     | 0.67      | 0.39         | 1.14         |                |             |
| <b>Overdominant</b> |                                           |          |                                                   |          |           |              |              |                |             |
| C/C-T/T             | 147                                       | 55.3     | 64                                                | 51.2     | 1         |              |              | 0.452468547    | 493.5       |
| C/T                 | 119                                       | 44.7     | 61                                                | 48.8     | 1.18      | 0.77         | 1.8          |                |             |
| <b>log-Additive</b> |                                           |          |                                                   |          |           |              |              |                |             |
| 0.1.2               | 266                                       | 68       | 125                                               | 32       | 0.84      | 0.62         | 1.12         | 0.228912846    | 492.6       |

\*Akaike information criterion

Supplementary table 2: Effect of *MBOAT7* rs641738 polymorphism on the outcomes of HCV infection

|                     | <b>HCV-<br/>Spontaneous<br/>clearance<br/>(N= 98)</b> | <b>%</b> | <b>Chronic HCV<br/>infection<br/>(N= 288)</b> | <b>%</b> | <b>OR</b> | <b>lower</b> | <b>upper</b> | <b>p-value</b> | <b>AIC*</b> |
|---------------------|-------------------------------------------------------|----------|-----------------------------------------------|----------|-----------|--------------|--------------|----------------|-------------|
| <b>Codominant</b>   |                                                       |          |                                               |          |           |              |              |                |             |
| C/C                 | 90                                                    | 31.2     | 25                                            | 25.5     | 1         |              |              | 0.499068595    | 442         |
| C/T                 | 144                                                   | 50       | 51                                            | 52       | 1.28      | 0.74         | 2.2          |                |             |
| T/T                 | 54                                                    | 18.8     | 22                                            | 22.4     | 1.47      | 0.75         | 2.85         |                |             |
| <b>Dominant</b>     |                                                       |          |                                               |          |           |              |              |                |             |
| C/C                 | 90                                                    | 31.2     | 25                                            | 25.5     | 1         |              |              | 0.278345397    | 440.2       |
| C/T-T/T             | 198                                                   | 68.8     | 73                                            | 74.5     | 1.33      | 0.79         | 2.23         |                |             |
| <b>Recessive</b>    |                                                       |          |                                               |          |           |              |              |                |             |
| C/C-C/T             | 234                                                   | 81.2     | 76                                            | 77.6     | 1         |              |              | 0.431348678    | 440.8       |
| T/T                 | 54                                                    | 18.8     | 22                                            | 22.4     | 1.25      | 0.72         | 2.19         |                |             |
| <b>Overdominant</b> |                                                       |          |                                               |          |           |              |              |                |             |
| C/C-T/T             | 144                                                   | 50       | 47                                            | 48       | 1         |              |              | 0.727026774    | 441.3       |
| C/T                 | 144                                                   | 50       | 51                                            | 52       | 1.09      | 0.69         | 1.72         |                |             |
| <b>log-Additive</b> |                                                       |          |                                               |          |           |              |              |                |             |
| 0.1.2               | 288                                                   | 74.6     | 98                                            | 25.4     | 1.21      | 0.87         | 1.69         | 0.246653287    | 440         |

\*Akaike information criterion

## Legends to Supplementary Figures

**Figure S1: Association of rs641738 genotype with liver injury in CHB group.** (A) Comparison between CC, CT and TT in terms of ALT. (B) AST. (C) HBV viral load. Data are expressed as the mean and standard deviation. Statistical analyses were performed using ANOVA.

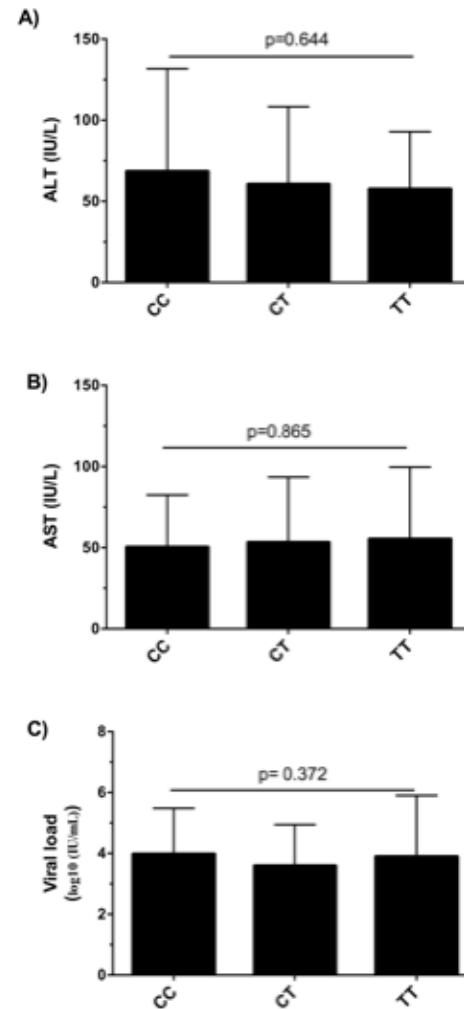

Supplement: 41598_2018_30824_MOESM1_ESM.pdf [file 41598_2018_30824_MOESM1_ESM.pdf]
